# Supplementary material for: Association between Ruminal pH and Rumen Fatty Acids Concentrations of Holstein Cows during the First Half of Lactation
Source: MDPI journal article supplement (doi:10.3390/ruminants2040026), 2022-09-26
Supplement: s1 [file s1]

Supplementary material

# Association between Ruminal pH and Rumen Fatty Acids Concentrations of Holstein Cows during the First Half of Lactation

Georgios C. Kitkas <sup>1</sup>, Georgios E. Valergakis <sup>2</sup>, Maria Kritsepi-Konstantinou <sup>3</sup>, Athanasios I. Gelasakis <sup>4</sup>, Panagiotis D. Katsoulos <sup>1</sup>, Emmanouil Kalaitzakis <sup>1</sup> and Nikolaos K. Panousis <sup>1,\*</sup>

<sup>1</sup> Clinic for Farm Animals, Faculty of Veterinary Medicine, Aristotle University of Thessaloniki, GR 54124 Thessaloniki, Greece

<sup>2</sup> Laboratory of Animal Husbandry, Faculty of Veterinary Medicine, Box 393, Aristotle University of Thessaloniki, GR 54124 Thessaloniki, Greece

<sup>3</sup> Diagnostic Laboratory, Faculty of Veterinary Medicine, Aristotle University of Thessaloniki, GR 54124 Thessaloniki, Greece

<sup>4</sup> Department of Animal Science, School of Animal Biosciences, Agricultural University of Athens, 11855 Athens, Greece

\* Correspondence: panousis@vet.auth.gr; Tel.: +30-2310994501

**Citation:** Kitkas, G.C.; Valergakis, G.E.; Kritsepi-Konstantinou, M.; Gelasakis, A.I.; Katsoulos, P.D.; Kalaitzakis, E.; Panousis, N.K.

Association between Ruminal pH and Rumen Fatty Acids

Concentrations of Holstein Cows during the First Half of Lactation.

2022, 2, 382–389. <https://doi.org/10.3390/ruminants2040026>

Academic Editors: Brian J. Leury and Maria Luisa Dettori

Received: 24 June 2022

Accepted: 21 September 2022

Published: 26 September 2022

**Publisher's Note:** MDPI stays neutral with regard to jurisdictional claims in published maps and institutional affiliations.

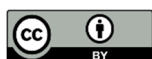

**Copyright:** © 2022 by the authors. Licensee MDPI, Basel, Switzerland. This article is an open access article distributed under the terms and conditions of the Creative Commons Attribution (CC BY) license (<https://creativecommons.org/licenses/by/4.0/>).

**Figure S1.** Box-plots of ruminal pH and body condition score during the three sampling occasions (30, 90 and 150 days-in-milk).

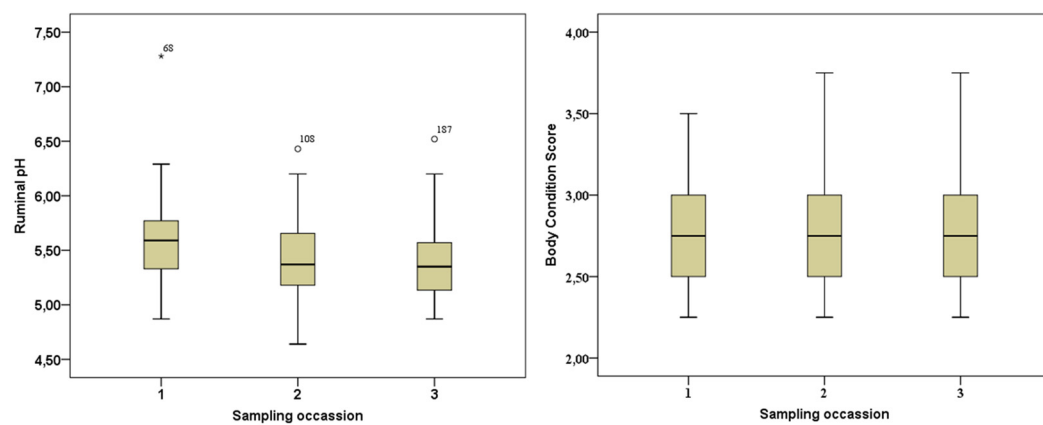

**Figure S2.** Box-plots of short and medium chain fatty acids content of ruminal fluid during the three sampling occasions (30, 90 and 150 days-in-milk).

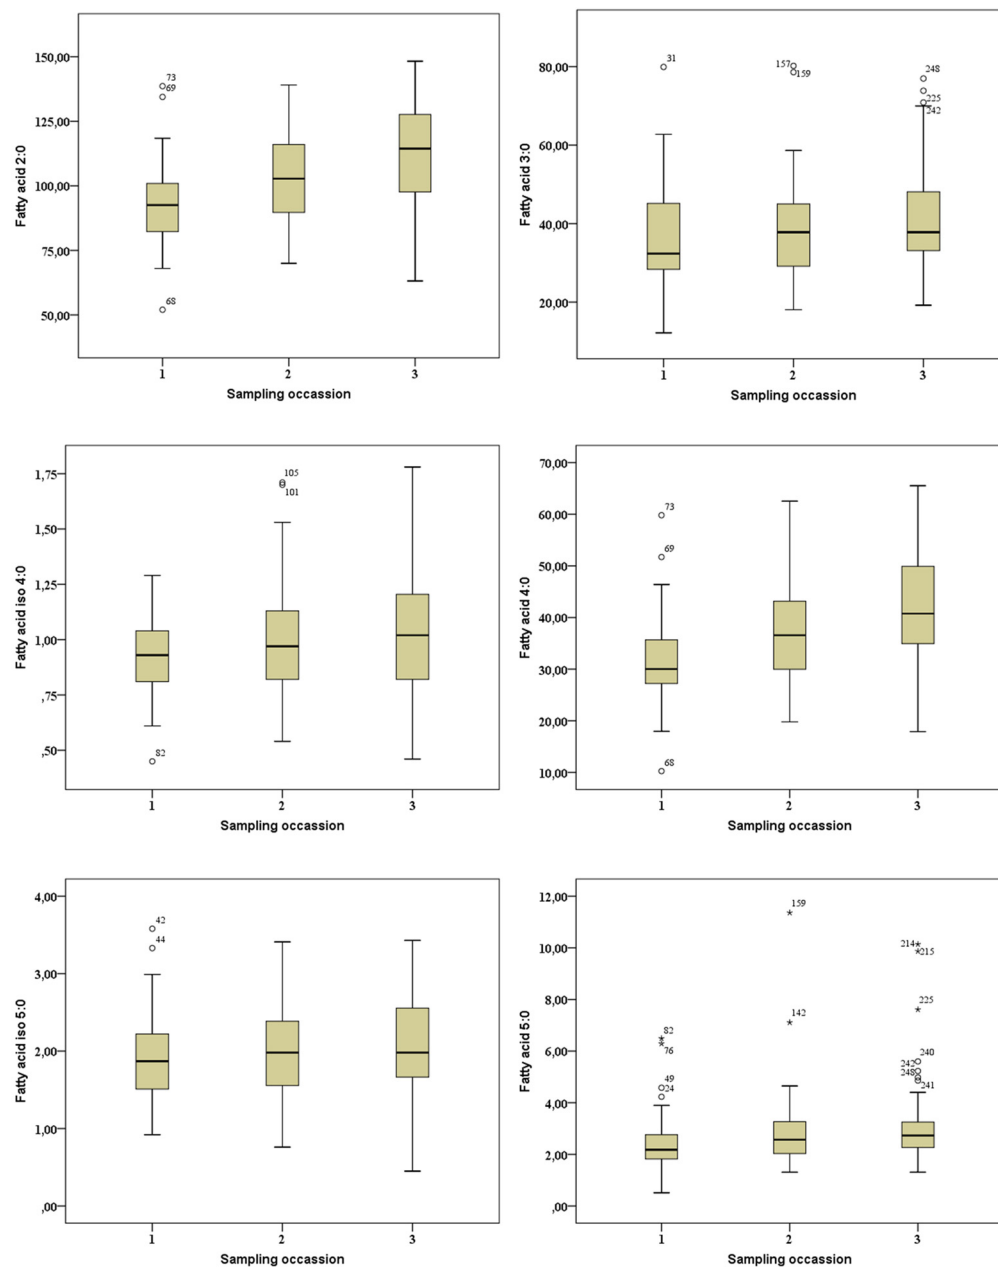

**Figure S3.** Box-plots of long chain fatty acids content of ruminal fluid during the three sampling occasions (30, 90 and 150 days-in-milk).

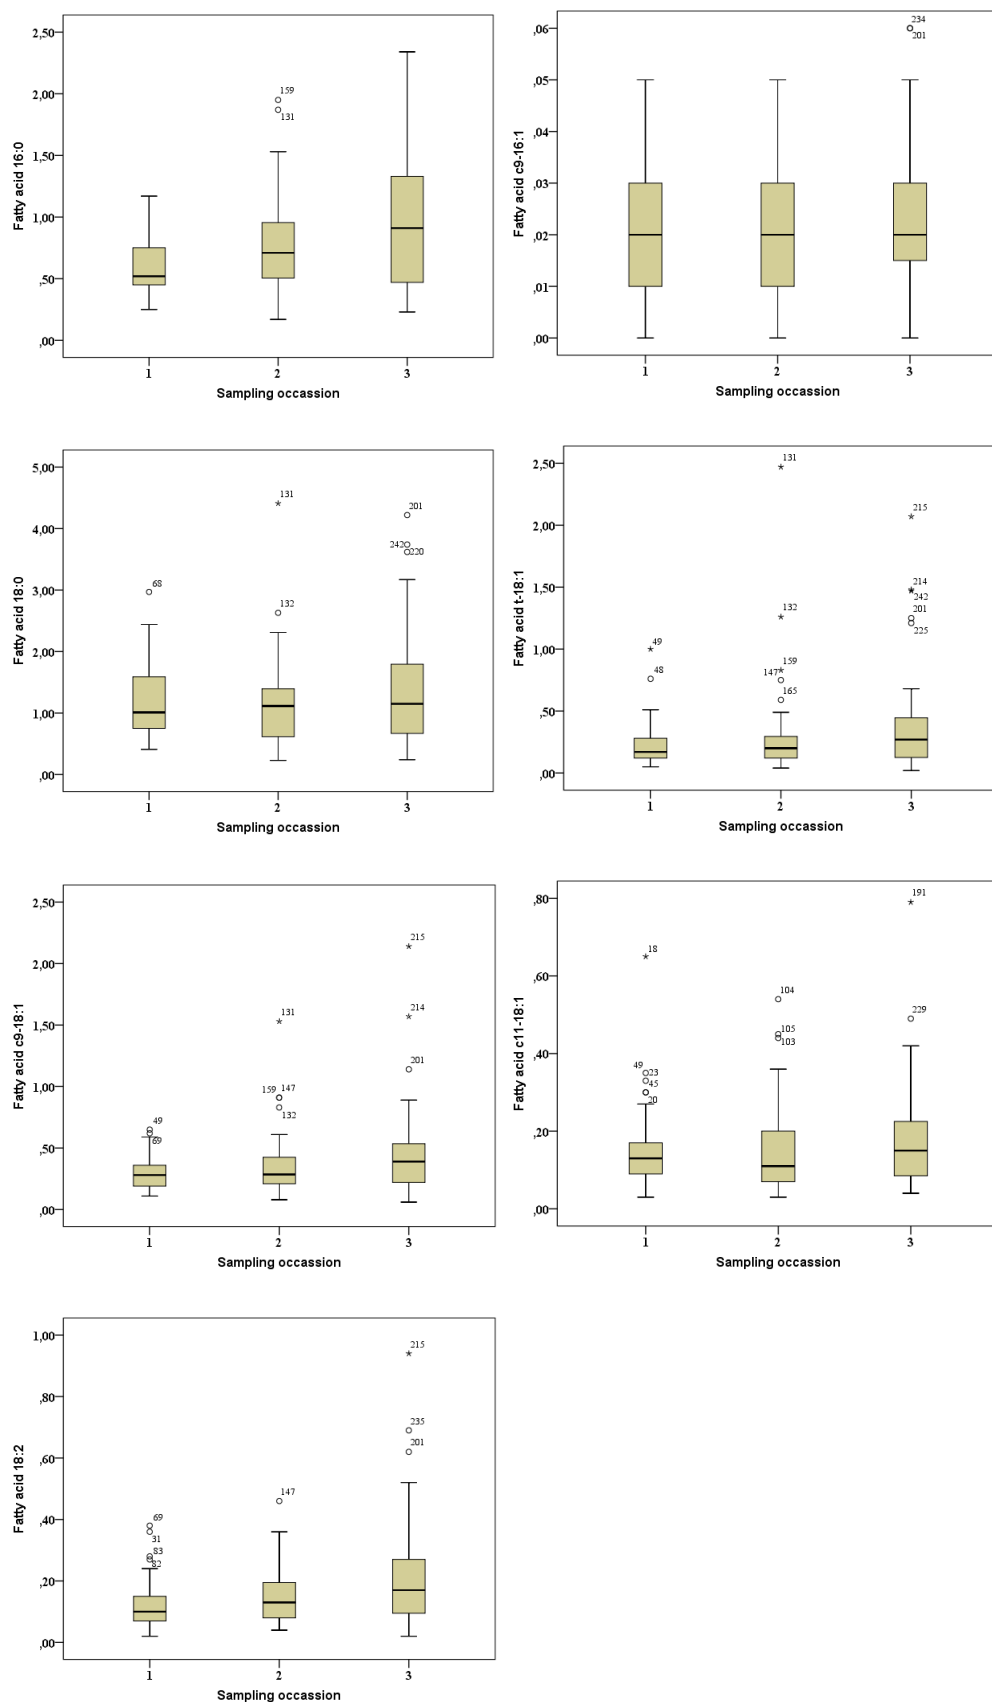

**Table S1.** Prevalence (number and %) of low ruminal pH status ( $\text{pH} \leq 5.5$ ) cases at the three sampling points [30, 90 and 150 days in milk (DIM)] in relation to parity.

|                               | 30 DIM         | 90 DIM         | 150 DIM        | Total |
|-------------------------------|----------------|----------------|----------------|-------|
| <b>Primiparous<br/>(n=34)</b> | 20<br>(58.82%) | 23<br>(67.65%) | 24<br>(70.59%) | 67    |
| <b>Multiparous<br/>(n=19)</b> | 4<br>(21.05%)  | 6<br>(31.58%)  | 11<br>(57.89%) | 21    |
| <b>Total<br/>(n=53)</b>       | 24<br>(45.28%) | 29<br>(54.72%) | 35<br>(66.04%) | 88    |

**Table S2.** Associations between ruminal pH status and the rest of the parameters forced into model 1 with rumen content's fatty acids concentration in the studied cow population.

| Fatty Acid | Parameter            | Category level | B      | SE     | P-value | 95 % CI |        |
|------------|----------------------|----------------|--------|--------|---------|---------|--------|
|            |                      |                |        |        |         | Lower   | Upper  |
| 2:0        | Ruminal pH status    | Low            | 13.60  | 2.614  | 0.000   | 8.43    | 18.76  |
|            |                      | Normal         |        |        | "Ref"   |         |        |
|            | Days post-calving    | 30             | -17.14 | 2.695  | 0.000   | -22.53  | -11.74 |
|            |                      | 90             | -8.75  | 3.390  | 0.012   | -15.54  | -1.97  |
|            |                      | 150            |        |        | "Ref"   |         |        |
|            | Parity number        | 1              | -1.38  | 3.196  | 0.668   | -7.78   | 5.02   |
|            |                      | >1             |        |        | "Ref"   |         |        |
|            | Body Condition Score | Continuous     | 0.88   | 4.306  | 0.838   | -7.65   | 9.42   |
|            | Intercept            | Continuous     | 102.04 | 12.468 | 0.000   | 77.33   | 126.75 |
| 3:0        | Ruminal pH status    | Low            | 13.12  | 1.841  | 0.000   | 9.48    | 16.76  |
|            |                      | Normal         |        |        | "Ref"   |         |        |
|            | Days post-calving    | 30             | -2.52  | 2.033  | 0.218   | -6.56   | 1.51   |
|            |                      | 90             | -2.17  | 2.010  | 0.284   | -6.15   | 1.82   |
|            |                      | 150            |        |        | "Ref"   |         |        |
|            | Parity number        | 1              | 2.73   | 2.131  | 0.207   | -1.55   | 7.00   |
|            |                      | >1             |        |        | "Ref"   |         |        |
|            | Body Condition Score | Continuous     | 1.50   | 2.972  | 0.615   | -4.40   | 7.40   |
|            | Intercept            | Continuous     | 27.90  | 8.573  | 0.002   | 10.88   | 44.91  |
| iso 4:0    | Ruminal pH status    | Low            | 0.01   | 0.037  | 0.857   | -0.07   | 0.08   |
|            |                      | Normal         |        |        | "Ref"   |         |        |
|            | Days post-calving    | 30             | -0.08  | 0.042  | 0.049   | -0.17   | -0.00  |
|            |                      | 90             | -0.02  | 0.048  | 0.710   | -0.11   | 0.08   |
|            |                      | 150            |        |        | "Ref"   |         |        |
|            | Parity number        | 1              | -0.04  | 0.041  | 0.317   | -0.12   | 0.04   |
|            |                      | >1             |        |        | "Ref"   |         |        |
|            | Body Condition Score | Continuous     | 0.11   | 0.059  | 0.070   | -0.01   | 0.22   |
|            | Intercept            | Continuous     | 0.73   | 0.169  | 0.000   | 0.40    | 1.07   |
| 4:0        | Ruminal pH status    | Low            | 8.84   | 1.468  | 0.000   | 5.94    | 11.74  |
|            |                      | Normal         |        |        | "Ref"   |         |        |
|            | Days post-calving    | 30             | -8.97  | 1.631  | 0.000   | -12.20  | -5.74  |
|            |                      | 90             | -3.57  | 1.612  | 0.029   | -6.76   | -0.37  |
|            |                      | 150            |        |        | "Ref"   |         |        |
|            | Parity number        | 1              | 0.87   | 1.672  | 0.603   | -2.47   | 4.22   |
|            |                      | >1             |        |        | "Ref"   |         |        |
|            | Body Condition Score | Continuous     | -2.09  | 2.346  | 0.374   | -6.75   | 2.56   |
|            | Intercept            | Continuous     | 41.40  | 6.769  | 0.000   | 27.97   | 54.83  |

|         |                      |            |       |       |       |       |      |
|---------|----------------------|------------|-------|-------|-------|-------|------|
| iso 5:0 | Ruminal pH status    | Low        | 0.18  | 0.099 | 0.073 | -0.02 | 0.37 |
|         |                      | Normal     |       |       | "Ref" |       |      |
|         | Days post-calving    | 30         | -0.15 | 0.105 | 0.161 | -0.36 | 0.06 |
|         |                      | 90         | -0.04 | 0.104 | 0.730 | -0.24 | 0.17 |
|         |                      | 150        |       |       | "Ref" |       |      |
|         | Parity number        | 1          | 0.05  | 0.129 | 0.722 | -0.21 | 0.30 |
|         |                      | >1         |       |       | "Ref" |       |      |
|         | Body Condition Score | Continuous | -0.03 | 0.171 | 0.874 | -0.37 | 0.31 |
|         | Intercept            | Continuous | 2.01  | 0.492 | 0.000 | 1.04  | 2.99 |

**Table S2 continue a.** Associations between ruminal pH status and the rest of the parameters forced into model 1 with rumen content's fatty acids concentration in the studied cow population.

| Fatty Acid | Parameter            | Category level | B     | SE    | P-value | 95 % CI |       |
|------------|----------------------|----------------|-------|-------|---------|---------|-------|
|            |                      |                |       |       |         | Lower   | Upper |
| 5:0        | Ruminal pH status    | Low            | 0.61  | 0.174 | 0.001   | 0.27    | 0.96  |
|            |                      | Normal         |       |       | "Ref"   |         |       |
|            | Days post-calving    | 30             | -0.64 | 0.195 | 0.002   | -1.03   | -0.25 |
|            |                      | 90             | -0.29 | 0.234 | 0.223   | -0.76   | 0.18  |
|            |                      | 150            |       |       | "Ref"   |         |       |
|            | Parity number        | 1              | 0.48  | 0.290 | 0.105   | -0.10   | 1.06  |
|            |                      | >1             |       |       | "Ref"   |         |       |
|            | Body Condition Score | Continuous     | -0.13 | 0.335 | 0.692   | -0.80   | 0.53  |
|            | Intercept            | Continuous     | 2.87  | 0.966 | 0.004   | 0.96    | 4.78  |
| 6:0        | Ruminal pH status    | Low            | 0.11  | 0.084 | 0.195   | -0.06   | 0.28  |
|            |                      | Normal         |       |       | "Ref"   |         |       |
|            | Days post-calving    | 30             | -0.11 | 0.092 | 0.253   | -0.29   | 0.08  |
|            |                      | 90             | 0.03  | 0.091 | 0.722   | -0.15   | 0.21  |
|            |                      | 150            |       |       | "Ref"   |         |       |
|            | Parity number        | 1              | -0.06 | 0.101 | 0.561   | -0.26   | 0.14  |
|            |                      | >1             |       |       | "Ref"   |         |       |
|            | Body Condition Score | Continuous     | -0.05 | 0.138 | 0.710   | -0.33   | 0.22  |
|            | Intercept            | Continuous     | 1.07  | 0.399 | 0.008   | 0.28    | 1.87  |
| 7:0        | Ruminal pH status    | Low            | -0.01 | 0.015 | 0.524   | -0.04   | 0.02  |
|            |                      | Normal         |       |       | "Ref"   |         |       |
|            | Days post-calving    | 30             | 0.03  | 0.019 | 0.095   | -0.01   | 0.07  |
|            |                      | 90             | 0.03  | 0.017 | 0.104   | -0.01   | 0.06  |
|            |                      | 150            |       |       | "Ref"   |         |       |
|            | Parity number        | 1              | -0.01 | 0.016 | 0.507   | -0.04   | 0.02  |
|            |                      | >1             |       |       | "Ref"   |         |       |
|            | Body Condition Score | Continuous     | -0.00 | 0.022 | 0.939   | -0.05   | 0.04  |

|         |                      |            |       |       |       |       |       |
|---------|----------------------|------------|-------|-------|-------|-------|-------|
| 16:0    | Intercept            | Continuous | 0.05  | 0.066 | 0.426 | -0.08 | 0.18  |
|         | Ruminal pH status    | Low        | 0.15  | 0.051 | 0.004 | 0.05  | 0.25  |
|         |                      | Normal     |       |       | "Ref" |       |       |
|         | Days post-calving    | 30         | -0.35 | 0.086 | 0.000 | -0.52 | -0.17 |
|         |                      | 90         | -0.19 | 0.080 | 0.020 | -0.35 | -0.03 |
|         |                      | 150        |       |       | "Ref" |       |       |
|         | Parity number        | 1          | 0.02  | 0.056 | 0.742 | -0.09 | 0.13  |
|         |                      | >1         |       |       | "Ref" |       |       |
|         | Body Condition Score | Continuous | 0.09  | 0.081 | 0.293 | -0.08 | 0.25  |
|         | Intercept            | Continuous | 0.64  | 0.240 | 0.009 | 0.17  | 1.12  |
| c9-16:1 | Ruminal pH status    | Low        | 0.00  | 0.002 | 0.470 | -0.01 | 0.00  |
|         |                      | Normal     |       |       | "Ref" |       |       |
|         | Days post-calving    | 30         | 0.00  | 0.003 | 0.373 | -0.01 | 0.00  |
|         |                      | 90         | 0.00  | 0.002 | 0.605 | -0.01 | 0.00  |
|         |                      | 150        |       |       | "Ref" |       |       |
|         | Parity number        | 1          | 0.00  | 0.002 | 0.299 | 0.00  | 0.01  |
|         |                      | >1         |       |       | "Ref" |       |       |
|         | Body Condition Score | Continuous | 0.00  | 0.003 | 0.325 | 0.00  | 0.01  |
|         | Intercept            | Continuous | 0.01  | 0.009 | 0.118 | 0.00  | 0.03  |

**Table S2 continue b.** Associations between ruminal pH status and the rest of the parameters forced into model 1 with rumen content's fatty acids concentration in the studied cow population.

| Fatty Acid | Parameter            | Category level | B     | SE    | P-value | 95 % CI |       |
|------------|----------------------|----------------|-------|-------|---------|---------|-------|
|            |                      |                |       |       |         | Lower   | Upper |
| 18:0       | Ruminal pH status    | Low            | 0.15  | 0.120 | 0.203   | -0.08   | 0.39  |
|            |                      | Normal         |       |       | "Ref"   |         |       |
|            | Days post-calving    | 30             | -0.14 | 0.146 | 0.332   | -0.43   | 0.15  |
|            |                      | 90             | -0.22 | 0.143 | 0.127   | -0.51   | 0.06  |
|            |                      | 150            |       |       | "Ref"   |         |       |
|            | Parity number        | 1              | 0.07  | 0.149 | 0.652   | -0.23   | 0.37  |
|            |                      | >1             |       |       | "Ref"   |         |       |
|            | Body Condition Score | Continuous     | 0.14  | 0.204 | 0.488   | -0.26   | 0.55  |
|            | Intercept            | Continuous     | 0.85  | 0.591 | 0.153   | -0.32   | 2.02  |
| t-18:1     | Ruminal pH status    | Low            | 0.04  | 0.034 | 0.203   | -0.02   | 0.11  |
|            |                      | Normal         |       |       | "Ref"   |         |       |
|            | Days post-calving    | 30             | -0.14 | 0.047 | 0.006   | -0.23   | -0.04 |
|            |                      | 90             | -0.08 | 0.044 | 0.068   | -0.17   | 0.01  |
|            |                      | 150            |       |       | "Ref"   |         |       |
|            | Parity number        | 1              | 0.03  | 0.052 | 0.612   | -0.08   | 0.13  |
|            |                      | >1             |       |       | "Ref"   |         |       |

|          |                      |            |       |       |       |       |       |
|----------|----------------------|------------|-------|-------|-------|-------|-------|
| c9-18:1  | Body Condition Score | Continuous | 0.02  | 0.065 | 0.796 | -0.11 | 0.15  |
|          | Intercept            | Continuous | 0.29  | 0.188 | 0.128 | -0.08 | 0.66  |
|          | Ruminal pH status    | Low        | 0.08  | 0.027 | 0.006 | 0.02  | 0.13  |
|          |                      | Normal     |       |       | "Ref" |       |       |
|          | Days post-calving    | 30         | -0.13 | 0.045 | 0.006 | -0.22 | -0.04 |
|          |                      | 90         | -0.08 | 0.039 | 0.043 | -0.16 | 0.00  |
|          |                      | 150        |       |       | "Ref" |       |       |
|          | Parity number        | 1          | 0.00  | 0.038 | 0.950 | -0.07 | 0.078 |
|          |                      | >1         |       |       | "Ref" |       |       |
|          | Body Condition Score | Continuous | -0.03 | 0.050 | 0.572 | -0.13 | 0.07  |
|          | Intercept            | Continuous | 0.47  | 0.148 | 0.002 | 0.18  | 0.77  |
| c11-18:1 | Ruminal pH status    | Low        | 0.01  | 0.018 | 0.562 | -0.03 | 0.05  |
|          |                      | Normal     |       |       | "Ref" |       |       |
|          | Days post-calving    | 30         | -0.03 | 0.026 | 0.339 | -0.08 | 0.03  |
|          |                      | 90         | -0.02 | 0.026 | 0.343 | -0.07 | 0.03  |
|          |                      | 150        |       |       | "Ref" |       |       |
|          | Parity number        | 1          | 0.00  | 0.020 | 0.943 | -0.04 | 0.04  |
|          |                      | >1         |       |       | "Ref" |       |       |
|          | Body Condition Score | Continuous | 0.06  | 0.028 | 0.025 | 0.01  | 0.12  |
|          | Intercept            | Continuous | 0.00  | 0.083 | 0.975 | -0.17 | 0.16  |
| 18:2     | Ruminal pH status    | Low        | 0.06  | 0.015 | 0.000 | 0.03  | 0.09  |
|          |                      | Normal     |       |       | "Ref" |       |       |
|          | Days post-calving    | 30         | -0.08 | 0.024 | 0.002 | -0.12 | -0.03 |
|          |                      | 90         | -0.06 | 0.026 | 0.028 | -0.11 | -0.01 |
|          |                      | 150        |       |       | "Ref" |       |       |
|          | Parity number        | 1          | 0.02  | 0.016 | 0.196 | -0.01 | 0.05  |
|          |                      | >1         |       |       | "Ref" |       |       |
|          | Body Condition Score | Continuous | -0.01 | 0.023 | 0.613 | -0.06 | 0.03  |
|          | Intercept            | Continuous | 0.19  | 0.023 | 0.006 | 0.06  | 0.33  |

**Table S3.** Association between ruminal pH as a continuous variable and the rest of the parameters forced into model 1 with rumen content's fatty acids concentration in the studied cow population.

|     |                      |                |        |       |         | 95 % CI |       |
|-----|----------------------|----------------|--------|-------|---------|---------|-------|
|     | Parameter            | Category level | B      | SE    | P-value | Lower   | Upper |
| 2:0 | Days post-calving    | 30             | -14.21 | 2.36  | 0.000   | -18.94  | -9.48 |
|     |                      | 90             | -8.08  | 3.09  | 0.011   | -14.27  | -1.89 |
|     |                      | 150            |        |       | “Ref”   |         |       |
|     | Parity number        | 1              | -4.46  | 2.81  | 0.117   | -10.08  | 1.15  |
|     |                      | >1             |        |       | “Ref”   |         |       |
|     | Body Condition Score | Continuous     | 2.38   | 3.71  | 0.523   | -4.97   | 9.73  |
| pH  | Continuous           | -27.6          | 2.92   | 0.000 | -33.38  | -21.82  |       |

|         |                      |            |        |        |       |        |        |
|---------|----------------------|------------|--------|--------|-------|--------|--------|
|         | Intercept            | Continuous | 257.14 | 18.77  | 0.000 | 220.01 | 294.26 |
| 3:0     | Days post-calving    | 30         | -0.30  | 1.72   | 0.864 | -3.70  | 3.11   |
|         |                      | 90         | -1.78  | 1.68   | 0.290 | -5.10  | 1.54   |
|         |                      | 150        |        |        | "Ref" |        |        |
|         | Parity number        | 1          | 0.88   | 1.84   | 0.634 | -2.81  | 4.57   |
|         |                      | >1         |        |        | "Ref" |        |        |
|         | Body Condition Score | Continuous | 1.77   | 2.53   | 0.485 | -3.24  | 6.79   |
|         | pH                   | Continuous | -23.98 | 2.07   | 0.000 | -28.06 | -19.89 |
|         | Intercept            | Continuous | 165.83 | 13.26  | 0.000 | 139.64 | 192.03 |
| iso 4:0 | Days post-calving    | 30         | -0.08  | 0.042  | 0.059 | -0.17  | 0.00   |
|         |                      | 90         | -0.02  | 0.048  | 0.722 | -0.11  | 0.08   |
|         |                      | 150        |        |        | "Ref" |        |        |
|         | Parity number        | 1          | 0.05   | 0.042  | 0.285 | -0.13  | 0.04   |
|         |                      | >1         |        |        | "Ref" |        |        |
|         | Body Condition Score | Continuous | 0.11   | 0.059  | 0.069 | -0.01  | 0.22   |
|         | pH                   | Continuous | -0.02  | 0.048  | 0.676 | -0.11  | 0.07   |
|         | Intercept            | Continuous | 0.84   | 0.307  | 0.007 | 0.24   | 1.45   |
| 4:0     | Days post-calving    | 30         | -7.50  | 1.470  | 0.000 | -10.42 | -4.59  |
|         |                      | 90         | -3.32  | 1.432  | 0.022 | -6.16  | -0.48  |
|         |                      | 150        |        |        | "Ref" |        |        |
|         | Parity number        | 1          | -0.33  | 1.538  | 0.829 | -3.41  | 2.75   |
|         |                      | >1         |        |        | "Ref" |        |        |
|         | Body Condition Score | Continuous | -1.98  | 2.126  | 0.355 | -6.19  | 2.24   |
|         | pH                   | Continuous | -16.00 | 1.755  | 0.000 | -19.46 | -12.53 |
|         | Intercept            | Continuous | 133.66 | 11.205 | 0.000 | 111.51 | 155.81 |
| iso 5:0 | Days post-calving    | 30         | -0.10  | 0.105  | 0.328 | -0.31  | 0.10   |
|         |                      | 90         | -0.03  | 0.102  | 0.801 | -0.23  | 0.18   |
|         |                      | 150        |        |        | "Ref" |        |        |
|         | Parity number        | 1          | 0.01   | 0.127  | 0.966 | -0.25  | 0.26   |
|         |                      | >1         |        |        | "Ref" |        |        |
|         | Body Condition Score | Continuous | -0.03  | 0.168  | 0.873 | -0.36  | 0.31   |
|         | pH                   | Continuous | -0.40  | 0.130  | 0.003 | -0.66  | -0.14  |
|         | Intercept            | Continuous | 4.30   | 0.853  | 0.000 | 2.61   | 5.98   |

**Table S3 continue a.** Association between ruminal pH as a continuous variable and the rest of the parameters forced into model 1 with rumen content's fatty acids concentration in the studied cow population.

| 95% CI    |                   |     |       |         |       |       |       |
|-----------|-------------------|-----|-------|---------|-------|-------|-------|
| Parameter | Category level    | B   | SE    | P-value | Lower | Upper |       |
| 5:0       | Days post-calving | 30  | -0.54 | 0.191   | 0.007 | -0.92 | -0.16 |
|           |                   | 90  | -0.27 | 0.225   | 0.235 | -0.72 | 0.18  |
|           |                   | 150 |       |         | “Ref” |       |       |
|           | Parity number     | 1   | 0.31  | 0.278   | 0.265 | -0.24 | 0.87  |

|         |                      |            |        |       |       |        |       |
|---------|----------------------|------------|--------|-------|-------|--------|-------|
|         |                      | >1         |        |       | "Ref" |        |       |
|         | Body Condition Score | Continuous | -0.15  | 0.321 | 0.641 | -0.79  | 0.49  |
|         | pH                   | Continuous | -1.12  | 0.217 | 0.000 | -1.55  | -0.69 |
|         | Intercept            | Continuous | 9.44   | 1.520 | 0.000 | 6.43   | 12.45 |
| 6:0     | Days post-calving    | 30         | -0.04  | 0.100 | 0.672 | 1.78   | 4.49  |
|         |                      | 90         | 0.05   | 0.080 | 0.504 | -0.11  | 0.21  |
|         |                      | 150        |        |       | "Ref" |        |       |
|         | Parity number        | 1          | -0.11  | 0.098 | 0.246 | -0.31  | 0.08  |
|         |                      | >1         |        |       | "Ref" |        |       |
|         | Body Condition Score | Continuous | 0.02   | 0.133 | 0.868 | -0.24  | 0.29  |
|         | pH                   | Continuous | -0.40  | 0.106 | 0.000 | -0.61  | -0.19 |
|         | Intercept            | Continuous | 3.13   | 0.684 | 0.000 | 1.78   | 4.49  |
|         | Days post-calving    | 30         | 0.03   | 0.019 | 0.123 | -0.01  | 0.07  |
|         |                      | 90         | 0.03   | 0.017 | 0.106 | -0.01  | 0.06  |
| 7:0     |                      | 150        |        |       | "Ref" |        |       |
|         | Parity number        | 1          | -0.01  | 0.016 | 0.567 | -0.04  | 0.02  |
|         |                      | >1         |        |       | "Ref" |        |       |
|         | Body Condition Score | Continuous | -0.002 | 0.023 | 0.922 | -0.05  | 0.04  |
|         | pH                   | Continuous | 0.02   | 0.021 | 0.327 | -0.02  | 0.06  |
|         | Intercept            | Continuous | -0.06  | 0.129 | 0.631 | -0.32  | 0.19  |
|         | Days post-calving    | 30         | -0.36  | 0.084 | 0.000 | -0.53  | -0.19 |
|         |                      | 90         | -0.20  | 0.085 | 0.021 | -0.37  | -0.03 |
|         |                      | 150        |        |       | "Ref" |        |       |
|         | Parity number        | 1          | 0.04   | 0.063 | 0.481 | -0.08  | 0.17  |
| 16:0    |                      | >1         |        |       | "Ref" |        |       |
|         | Body Condition Score | Continuous | 0.08   | 0.089 | 0.391 | -0.10  | 0.25  |
|         | pH                   | Continuous | -0.10  | 0.070 | 0.179 | -0.23  | 0.04  |
|         | Intercept            | Continuous | 1.26   | 0.45  | 0.006 | 0.36   | 2.16  |
|         | Days post-calving    | 30         | -0.002 | 0.003 | 0.414 | -0.008 | 0.003 |
|         |                      | 90         | -0.001 | 0.002 | 0.642 | -0.006 | 0.004 |
|         |                      | 150        |        |       | "Ref" |        |       |
|         | Parity number        | 1          | 0.002  | 0.002 | 0.377 | -0.002 | 0.006 |
|         |                      | >1         |        |       | "Ref" |        |       |
|         | Body Condition Score | Continuous | 0.003  | 0.003 | 0.302 | -0.003 | 0.009 |
| c9-16:1 | pH                   | Continuous | 0.001  | 0.003 | 0.810 | -0.005 | 0.006 |
|         | Intercept            | Continuous | 0.009  | 0.017 | 0.574 | -0.024 | 0.043 |
|         | Days post-calving    | 30         | -0.19  | 0.149 | 0.206 | -0.49  | 0.11  |
|         |                      | 90         | -0.24  | 0.142 | 0.093 | -0.53  | 0.04  |
|         |                      | 150        |        |       | "Ref" |        |       |
|         | Parity number        | 1          | 0.14   | 0.152 | 0.353 | -0.16  | 0.45  |
|         |                      | >1         |        |       | "Ref" |        |       |
|         | Body Condition Score | Continuous | 0.12   | 0.206 | 0.576 | -0.29  | 0.52  |
|         |                      |            |        |       |       |        |       |
|         |                      |            |        |       |       |        |       |
| 18:0    |                      |            |        |       |       |        |       |
|         |                      |            |        |       |       |        |       |
|         |                      |            |        |       |       |        |       |
|         |                      |            |        |       |       |        |       |
|         |                      |            |        |       |       |        |       |

|           |            |      |       |       |       |      |
|-----------|------------|------|-------|-------|-------|------|
| pH        | Continuous | 0.07 | 0.159 | 0.668 | -0.25 | 0.38 |
| Intercept | Continuous | 0.61 | 1.03  | 0.552 | -1.42 | 2.64 |

**Table S3 continue b.** Association between ruminal pH as a continuous variable and the rest of the parameters forced into model 1 with rumen content's fatty acids concentration in the studied cow population.

|          |                      | 95 % CI        |        |       |         |       |        |
|----------|----------------------|----------------|--------|-------|---------|-------|--------|
|          | Parameter            | Category level | B      | SE    | P-value | Lower | Upper  |
| t18:1    | Days post-calving    | 30             | -0.14  | 0.047 | 0.003   | -0.24 | -0.05  |
|          |                      | 90             | -0.09  | 0.044 | 0.055   | -0.17 | 0.00   |
|          |                      | 150            |        |       | "Ref"   |       |        |
|          | Parity number        | 1              | 0.04   | 0.054 | 0.448   | -0.07 | 0.15   |
|          |                      | >1             |        |       | "Ref"   |       |        |
|          | Body Condition Score | Continuous     | 0.02   | 0.066 | 0.818   | -0.12 | 0.15   |
|          | pH                   | Continuous     | -0.004 | 0.044 | 0.926   | -0.09 | 0.08   |
| c9-18:1  | Intercept            | Continuous     | 0.33   | 0.311 | 0.286   | -0.28 | 0.95   |
|          | Days post-calving    | 30             | -0.13  | 0.046 | 0.005   | -0.23 | -0.04  |
|          |                      | 90             | -0.08  | 0.041 | 0.042   | -0.17 | -0.003 |
|          |                      | 150            |        |       | "Ref"   |       |        |
|          | Parity number        | 1              | 0.01   | 0.042 | 0.759   | -0.07 | 0.10   |
|          |                      | >1             |        |       | "Ref"   |       |        |
|          | Body Condition Score | Continuous     | -0.02  | 0.053 | 0.650   | -0.13 | 0.08   |
| c11-18:1 | pH                   | Continuous     | -0.05  | 0.036 | 0.201   | -0.12 | 0.03   |
|          | Intercept            | Continuous     | 0.76   | 0.253 | 0.003   | 0.26  | 1.26   |
|          | Days post-calving    | 30             | -0.02  | 0.026 | 0.365   | -0.08 | 0.03   |
|          |                      | 90             | -0.02  | 0.026 | 0.340   | -0.08 | 0.03   |
|          |                      | 150            |        |       | "Ref"   |       |        |
|          | Parity number        | 1              | -0.002 | 0.020 | 0.910   | -0.04 | 0.04   |
|          |                      | >1             |        |       | "Ref"   |       |        |
| 18:2     | Body Condition Score | Continuous     | 0.06   | 0.028 | 0.025   | 0.01  | 0.12   |
|          | pH                   | Continuous     | -0.02  | 0.023 | 0.474   | -0.06 | 0.03   |
|          | Intercept            | Continuous     | 0.09   | 0.148 | 0.525   | -0.20 | 0.39   |
|          | Days post-calving    | 30             | -0.07  | 0.023 | 0.005   | -0.12 | -0.02  |
|          |                      | 90             | -0.06  | 0.025 | 0.025   | -0.11 | -0.01  |
|          |                      | 150            |        |       | "Ref"   |       |        |
|          | Parity number        | 1              | 0.01   | 0.016 | 0.368   | -0.02 | 0.05   |
|          |                      | >1             |        |       | "Ref"   |       |        |
|          | Body Condition Score | Continuous     | -0.003 | 0.023 | 0.906   | -0.05 | 0.04   |
|          | pH                   | Continuous     | -0.09  | 0.019 | 0.000   | -0.13 | -0.06  |
|          | Intercept            | Continuous     | 0.72   | 0.120 | 0.000   | 0.49  | 0.96   |
